# Supplementary material
Source: Elsevier journal article supplement (https://www.sciencedirect.com/science/article/pii/S2238785419302285)
Supplement: mmc1 [file S2238785419302285:mmc1.docx]

**Supporting information**

**The influence of calcination and reduction treatments on the adhesive and biocompatibility properties of TiZr nanotubes fabricated *via* anodizing**

Maria Vardaki1,2, Shiva Mohajernia2, Aida Pantazi3, Ionela Cristina Nica4, Marius Enachescu3, Anca Mazare2, Ioana Demetrescu1,5,*, Patrik Schmuki2,*

1 General Chemistry Department, University POLITEHNICA of Bucharest, Str. Polizu 1-7, 011061, Bucharest, Romania

2 WW4-LKO, Department of Materials Science, Friedrich Alexander University of Erlangen Nurnberg, Martensstr. 7, 91058, Erlangen, Germany

3 Center for Surface Science and Nanotechnology University POLITEHNICA of Bucharest, SplaiulIndependentei nr. 313, 060042, Bucharest, Romania

4 Department of Biochemistry and Molecular Biology, Faculty of Biology, University of Bucharest,SplaiulIndependentei91-95 , 050095, Bucharest, Romania

5 Academy of Romanian Scientists, SplaiulIndependentei 54, 050094 Bucharest, Romania

* corresponding authors

**
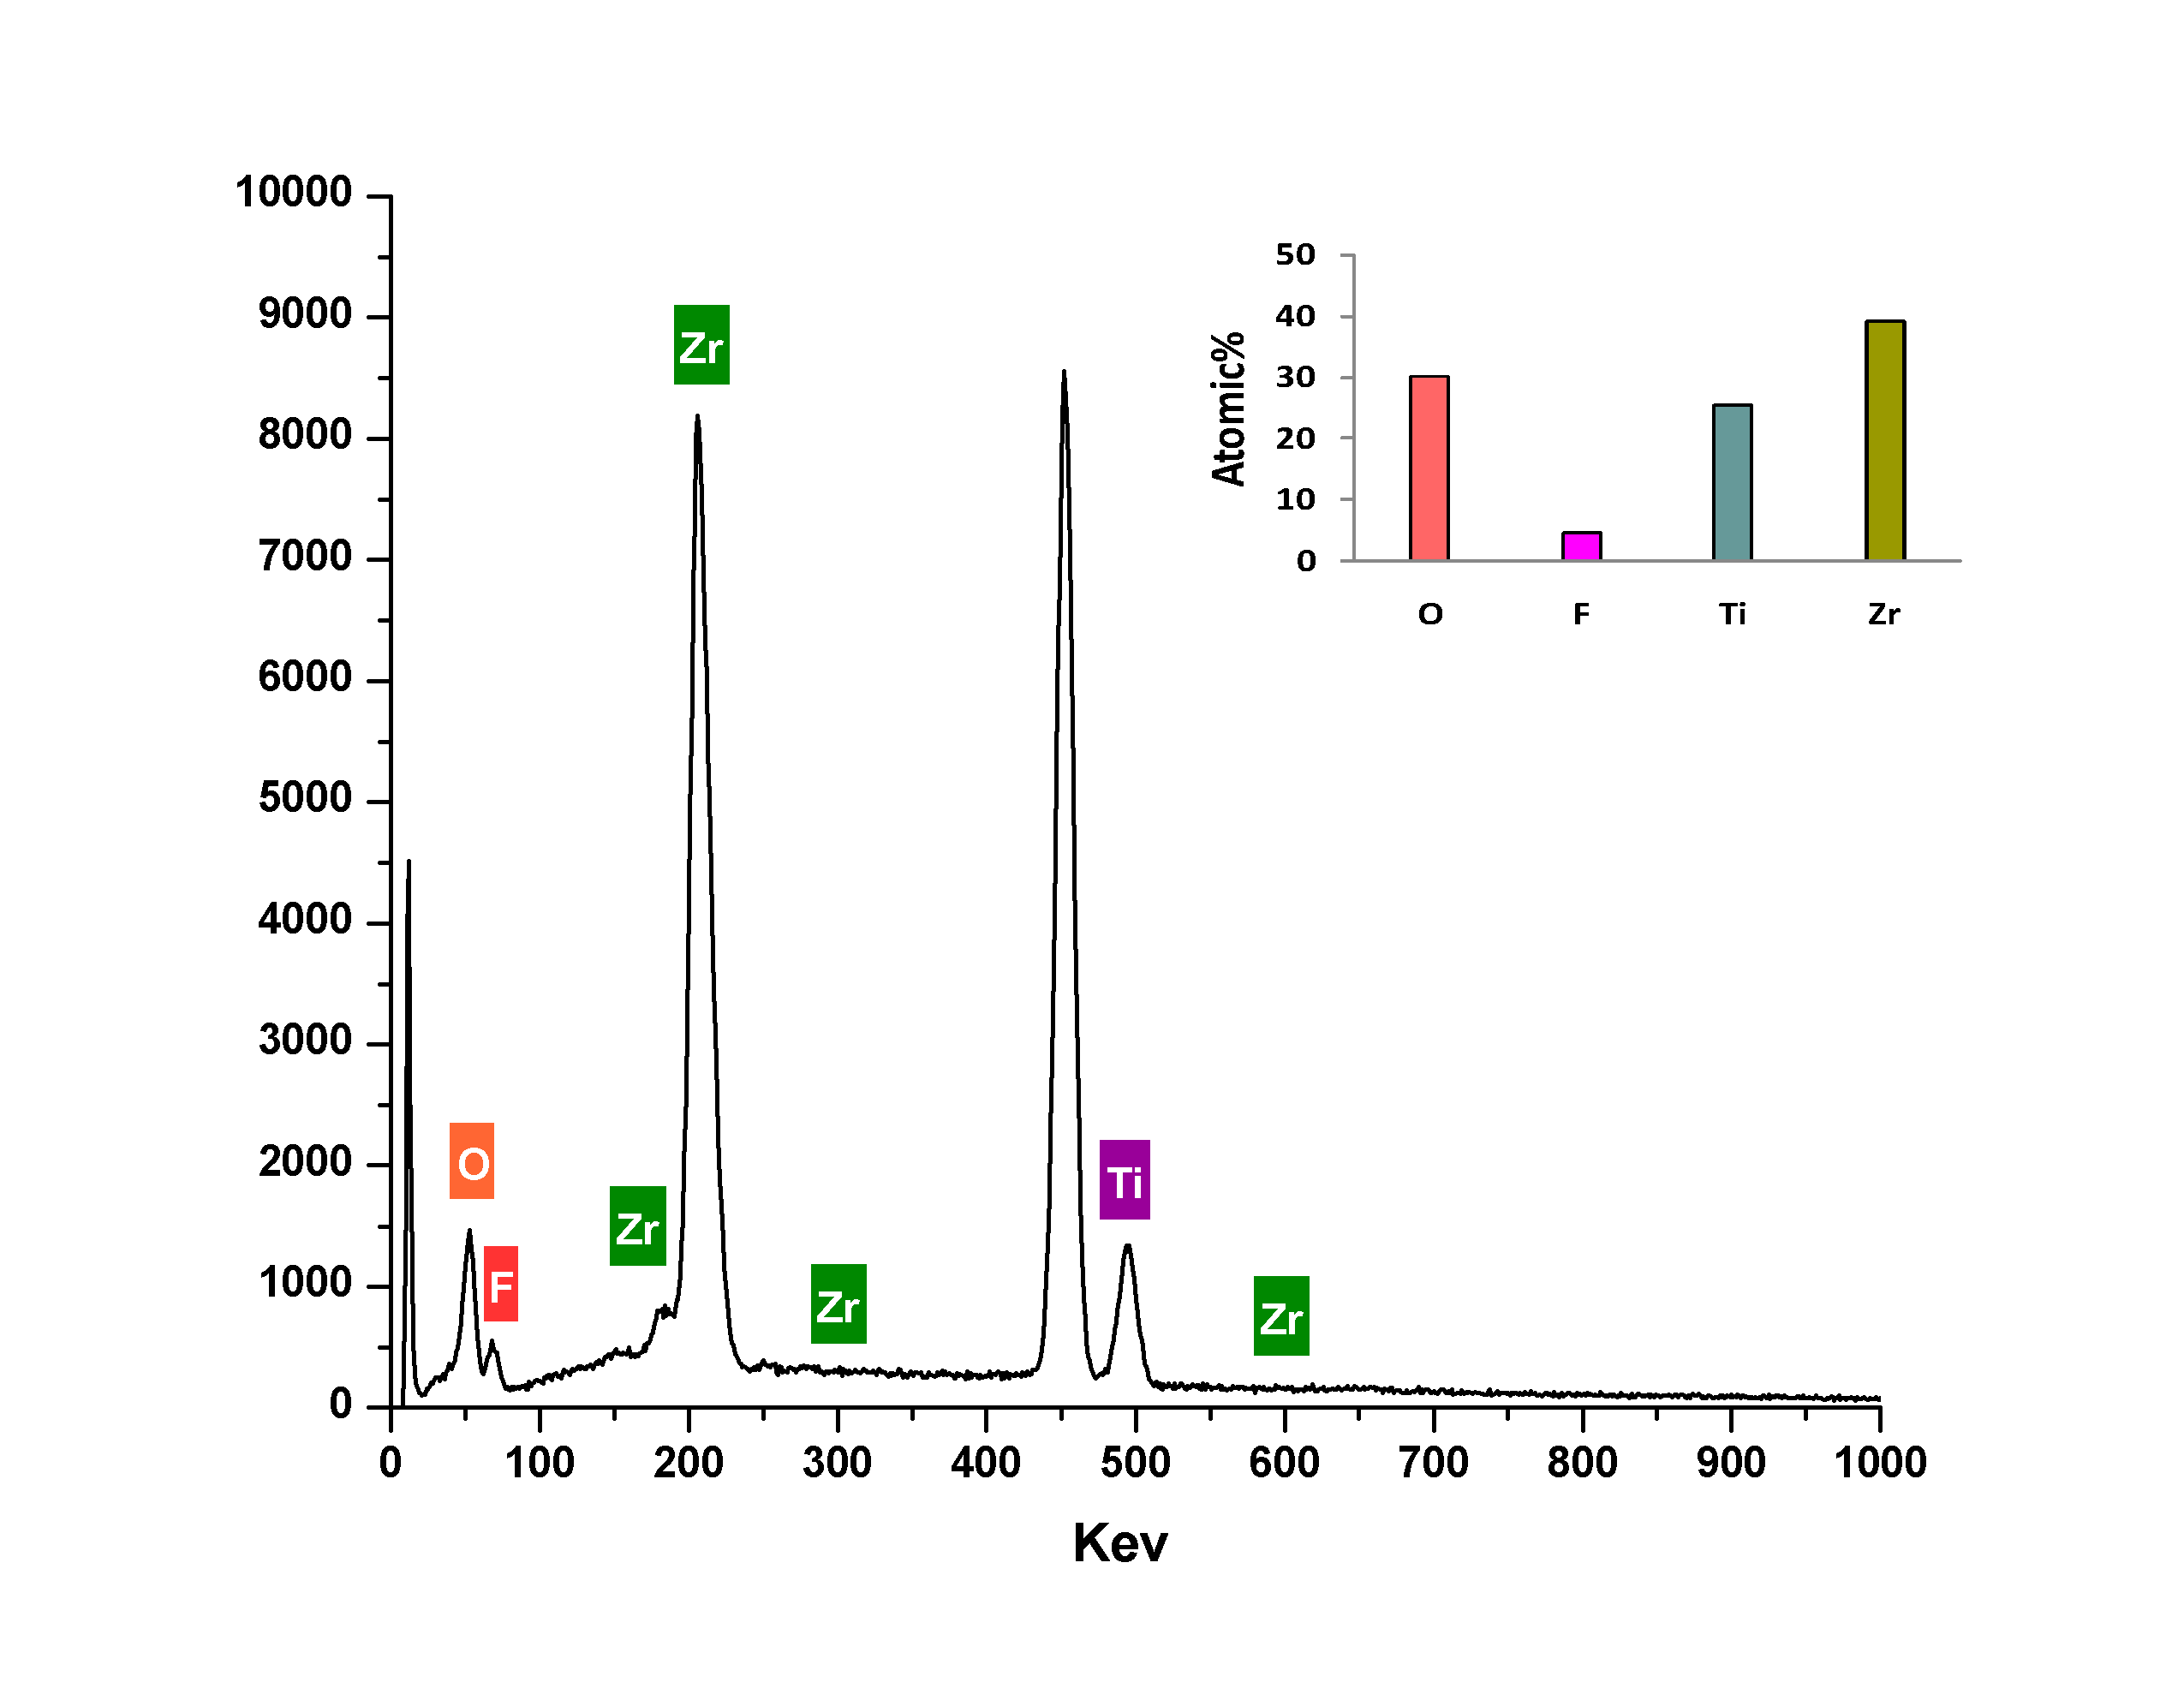
**

**Fig. S1** EDX spectra of as formed nanotubes on TiZr alloy


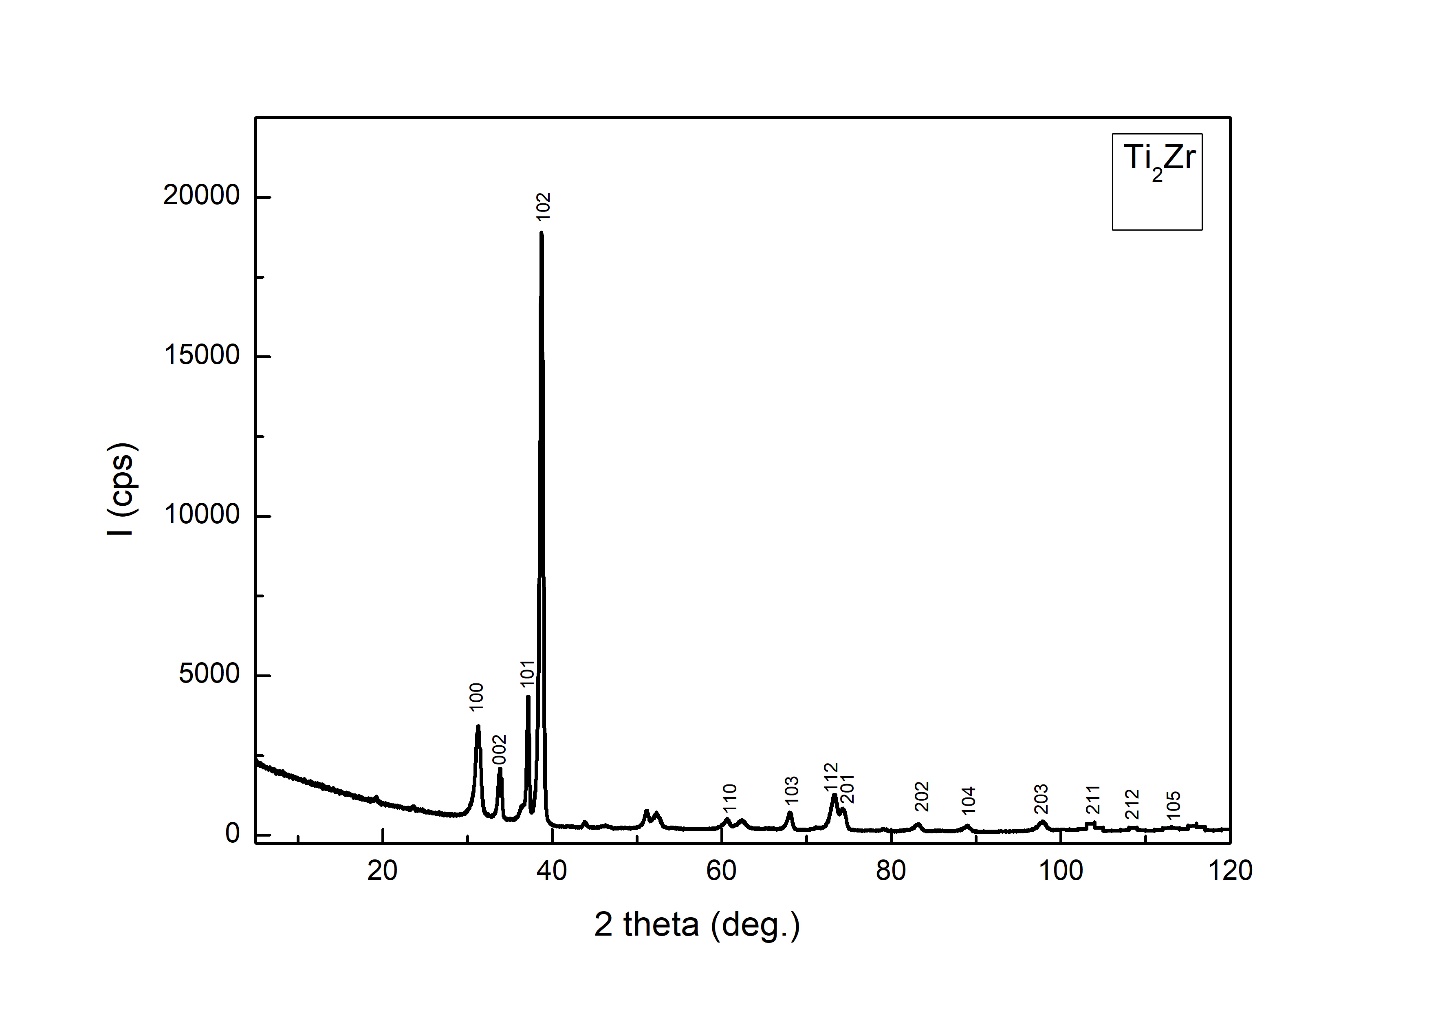


**Fig. S2** XRD spectra of the TiZr alloy substrate (substrate is Ti2Zr)

In the following figures the steps involved in the AFM investigation are shown, as an example for the reduced nanotubes.


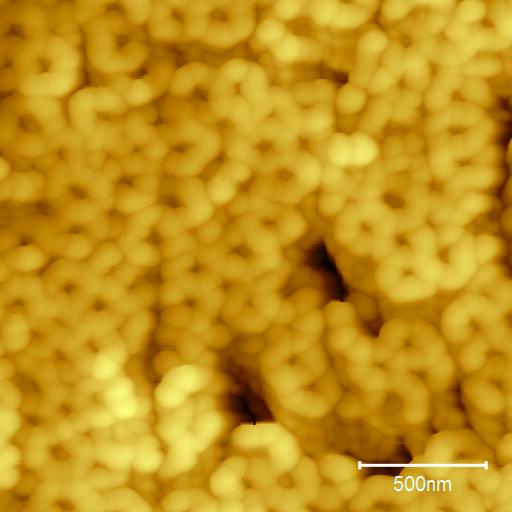

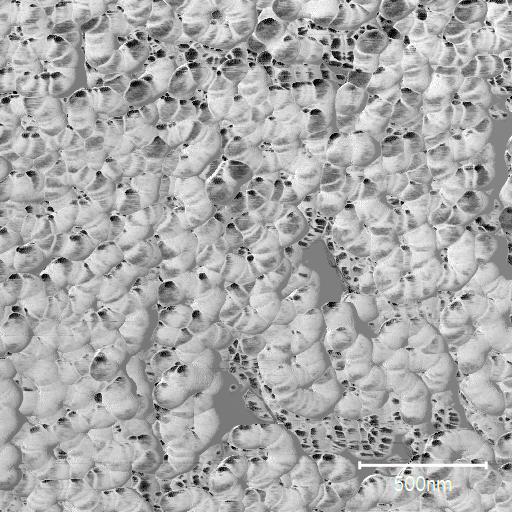


**Fig. S3** 2x2 um 2D AFM images of reduced nanotubes: a) Topography; b) Phase contrast


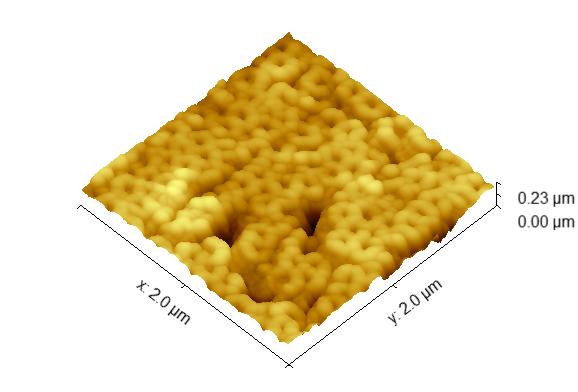


**Fig. S4** 2x2 um 3D AFM image of the reduced nanotubes


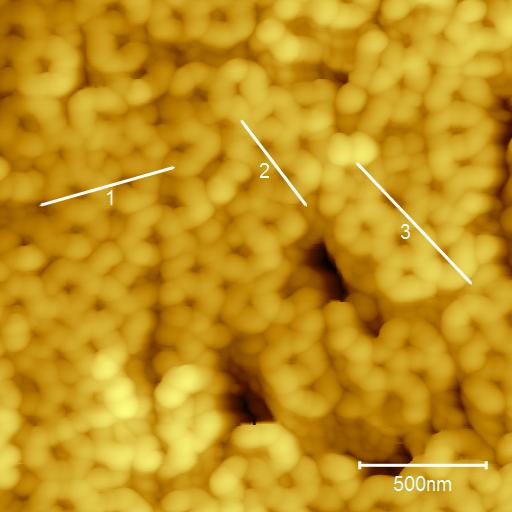


**Fig. S5** Directions of the traced profiles on the AFM 2D topography image shown in Fig S3.


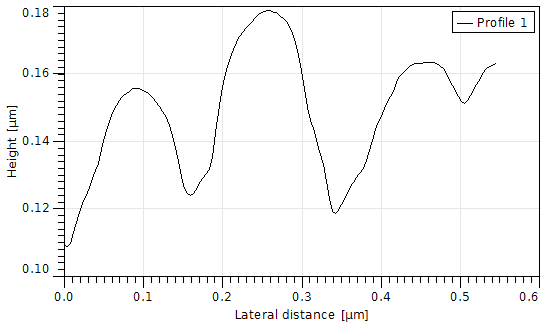

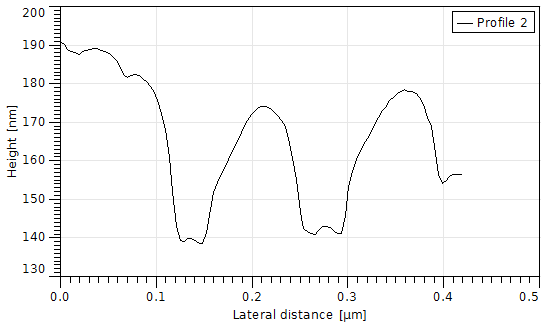

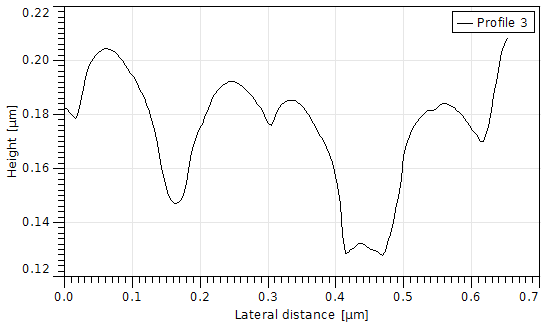


**Fig. S6** Graphical representations of the profiles marked in the figure S5


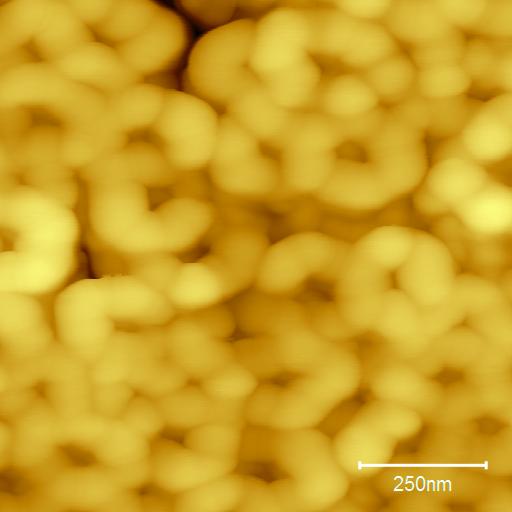

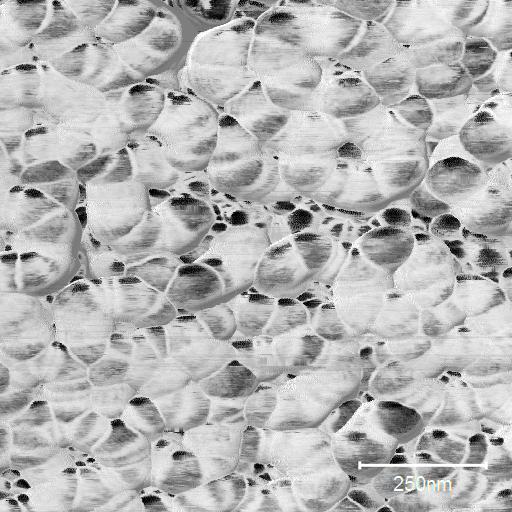

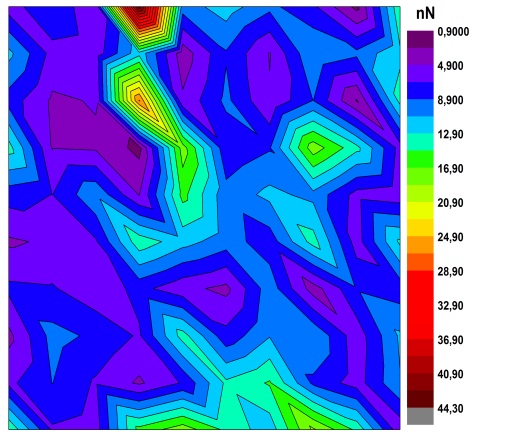


**Fig. S7** 1x1 um 2D AFM images of reduced nanotubes: a) Topography; b) Phase contrast; c) Adhesion Force Map


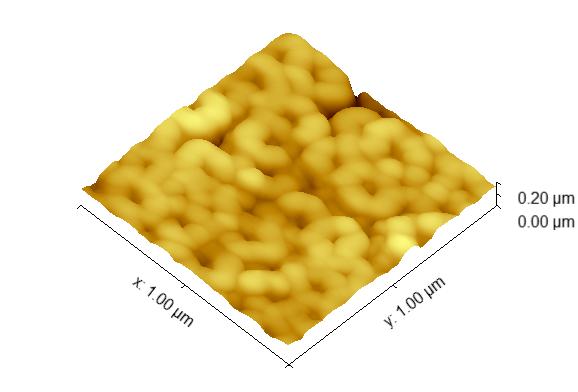


**Fig. S8** 1x1 um 3D AFM image of reduced nanotubes


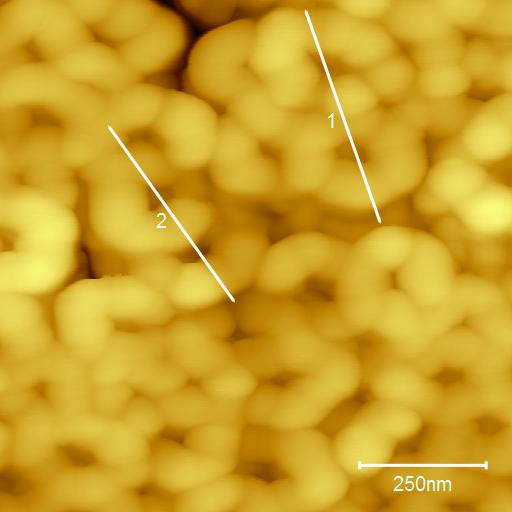


**Fig. S9** Directions of the traced profiles on the AFM 2D topography image

**
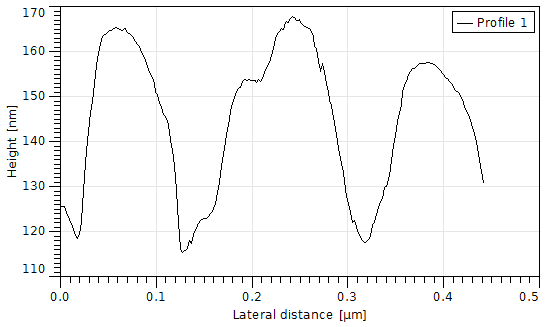

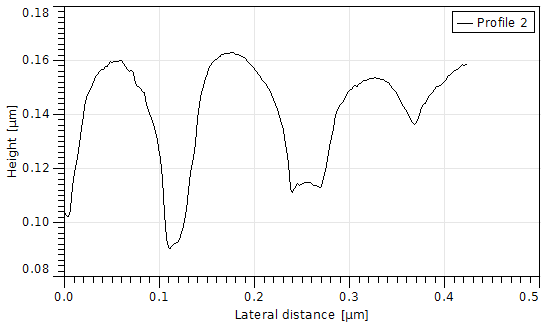
**

**Fig. S10** Graphical representations of the marked profiles


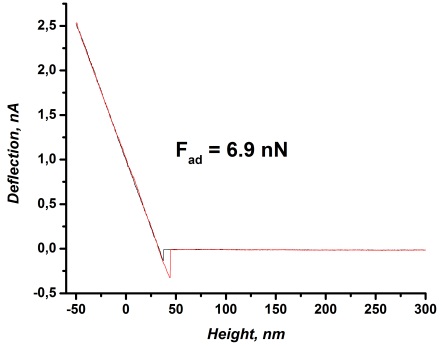

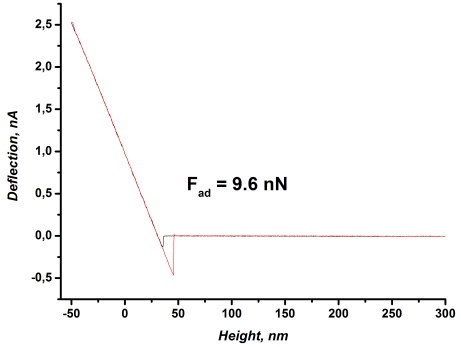

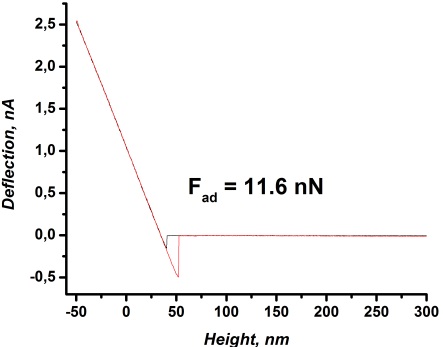


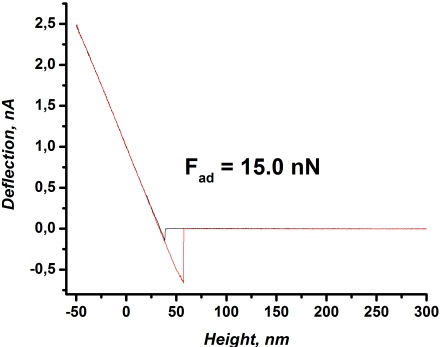

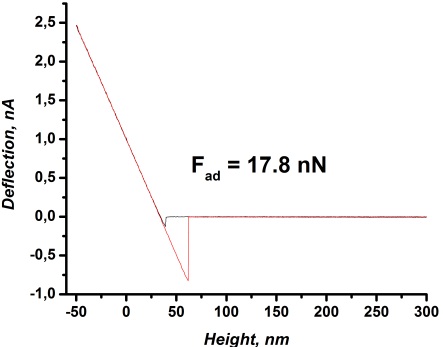


**Fig. S11 .** Force-distance curves

***Analysis of the substrate – reduced TiZr***


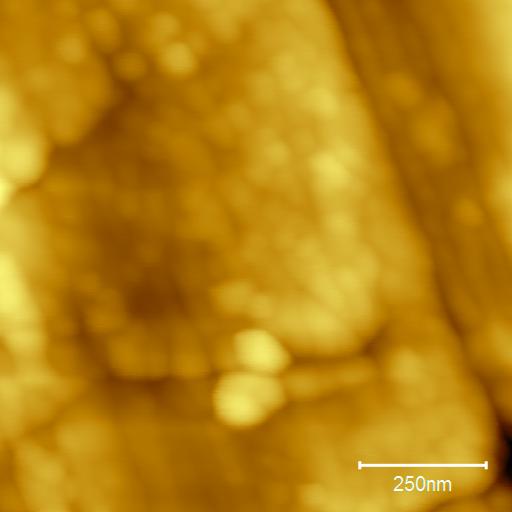

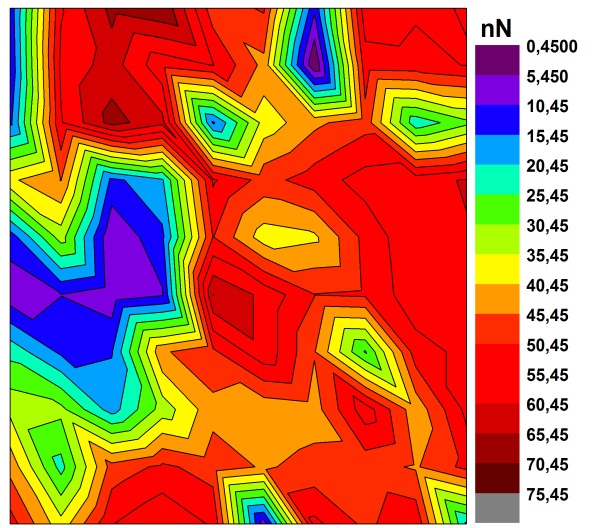


**Fig. S12** 1x1 um 2D AFM images of the reduced TiZr substrate: a) Topography; b) Adhesion Force Map


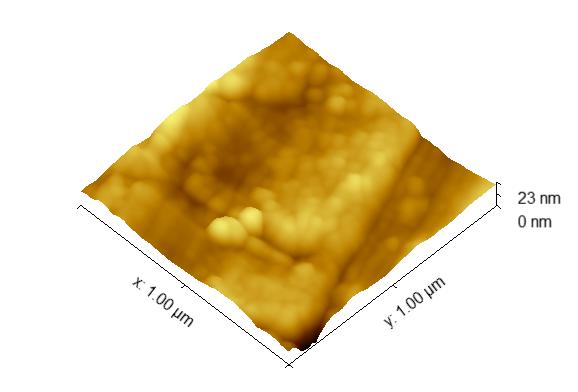


**Fig. S13** 1x1 um 3D AFM image of reduced TiZr substrate.


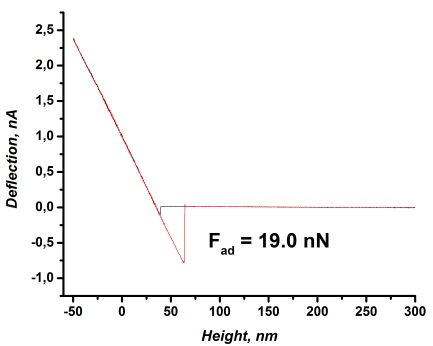

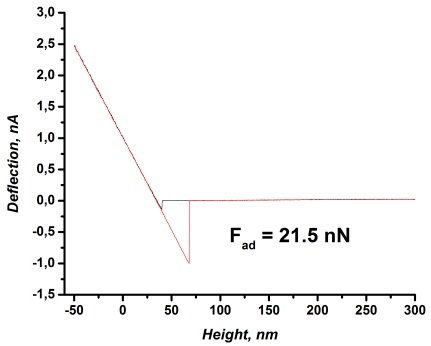

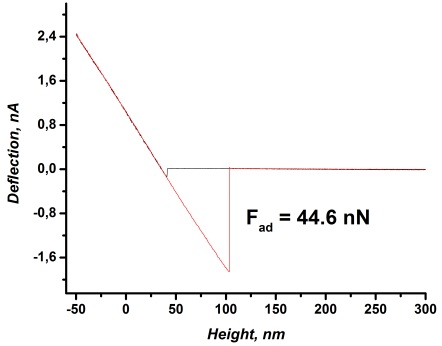

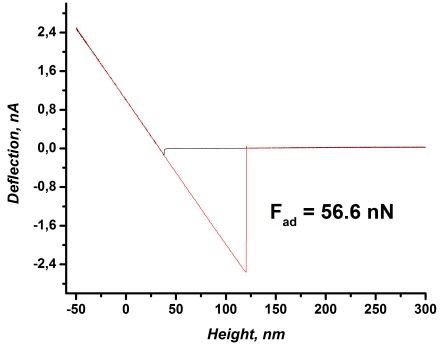

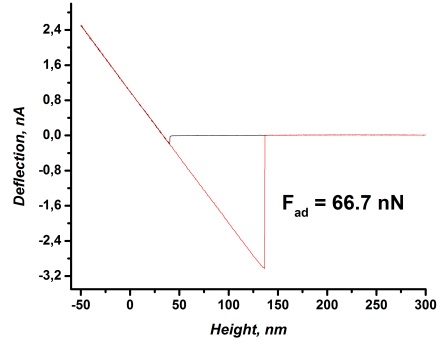


**Fig. S14** Force-distance curves for the reduced TiZr substrate.
